# Supplementary material for: Domain-specific physical activity and affective wellbeing among adolescents: an observational study of the moderating roles of autonomous and controlled motivation
Source: PubMed Central journal article supplement (PMC6131748; doi:10.1186/s12966-018-0722-0), 2018-09-10
Supplement: 12966_2018_722_MOESM1_ESM.pdf [file 12966_2018_722_MOESM1_ESM.pdf]

## Appendix A: Travel Diary

MONDAY

**1. Please answer as accurately as you can about your trip TO SCHOOL on Monday morning.**

What time did you leave home? Hour  ..... Minute  .....

What time did you arrive at school? Hour  ..... Minute  .....

**Please fill in the following table based on how you got TO school and how long it took.**

|                           | You may colour<br>MORE THAN ONE (●)                                                       | How many minutes did you spend in<br>each type of transport?                                                                                                                                          |
|---------------------------|-------------------------------------------------------------------------------------------|-------------------------------------------------------------------------------------------------------------------------------------------------------------------------------------------------------|
| <b>Walk</b>               | ○                                                                                         |  .....hours and  .....minutes     |
| <b>Bicycle</b>            | ○                                                                                         |  .....hours and  .....minutes     |
| <b>Skateboard/Scooter</b> | ○                                                                                         |  .....hours and  .....minutes |
| <b>Bus</b>                | ○                                                                                         |  .....hours and  .....minutes |
| <b>Train</b>              | ○                                                                                         |  .....hours and  .....minutes |
| <b>Car</b>                | ○                                                                                         |  .....hours and  .....minutes |
| <b>Other</b>              |  ..... |  .....hours and  .....minutes |

**2. Please answer as accurately as you can about your trip FROM SCHOOL on Monday afternoon.**

What time did you leave school? Hour  ..... Minute  .....

What time did you arrive at your next destination? Hour  ..... Minute  .....

Was this destination home  (H) or other  (O)

If other, please explain

..... 

Please fill in the following table based on your trip **FROM** school and how long it took.

|                    | You may colour<br>MORE THAN ONE (●)                                                     | How many minutes did you spend in<br>each type of transport?                                                                                                                                      |
|--------------------|-----------------------------------------------------------------------------------------|---------------------------------------------------------------------------------------------------------------------------------------------------------------------------------------------------|
| Walk               | ○                                                                                       |  .....hours and  .....minutes |
| Bicycle            | ○                                                                                       |  .....hours and  .....minutes |
| Skateboard/Scooter | ○                                                                                       |  .....hours and  .....minutes |
| Bus                | ○                                                                                       |  .....hours and  .....minutes |
| Train              | ○                                                                                       |  .....hours and  .....minutes |
| Car                | ○                                                                                       |  .....hours and  .....minutes |
| Other              |  ..... |  .....hours and  .....minutes |
